# Supplementary material for: Homogenous Multifunctional Microspheres Induce Ferroptosis to Promote the Anti-hepatocarcinoma Effect of Chemoembolization
Source: Research Square preprint supplement (doi:10.21203/rs.3.rs-1197474/v1), 2021-12-29
Supplement: Supplementary file 1 [file 08217670bdde2782a9be0c87.docx]

**Supporting Information**

**Homogenous multifunctional microspheres induce ferroptosis to promote the anti-hepatocarcinoma effect of chemoembolization**

Minjiang Chen1,2†, Jie Li2, 3†, Gaofeng Shu2†, Lin Shen2, Enqi Qiao2, Nannan Zhang2, Shiji Fang2, Xiaoxiao Chen2, Zhongwei Zhao2, Jianfei Tu2, Jingjing Song 2*, Yongzhong Du1*, Jiansong Ji2*

1Institute of Pharmaceutics, College of Pharmaceutical Sciences, Zhejiang University, Hangzhou, 310058, China.

2Key Laboratory of Imaging Diagnosis and Minimally Invasive Intervention Research, Lishui Hospital of Zhejiang University, the Fifth Affiliated Hospital of Wenzhou Medical University, Lishui, 323000, China.

3Department of Medical Imaging, Ningbo Women & Childen's Hospital, Ningbo, 315012, China

† Minjiang Chen, Jie Li and Gaofeng Shu contributed equally to this work.

***Correspondence to:**

**Jiansong Ji**, MD, PhD, Key Laboratory of Imaging Diagnosis and Minimally Invasive Intervention Research, Lishui Hospital of Zhejiang University, Lishui, 323000, China. Tel.: +86 578 2285011. E-mail: jijiansong@zju.edu.cn

**Yongzhong Du**, PhD, Institute of Pharmaceutics, College of Pharmaceutical Sciences, Zhejiang University, Hangzhou, 310058, China. Tel.: +86 571 88208435. E-mail: duyongzhong@zju.edu.cn

**Jingjing Song**, MD, Key Laboratory of Imaging Diagnosis and Minimally Invasive Intervention Research, Lishui Hospital of Zhejiang University, Lishui, 323000, China. Tel.: +86 578 2285011. E-mail: 8808s_j996@163.com


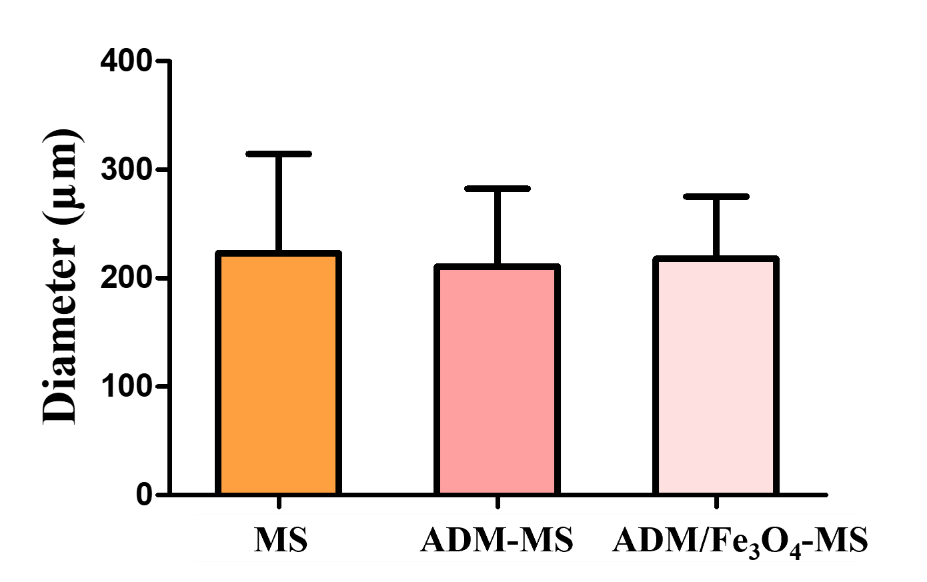


**Figure S1.** The particle size of MS, ADM-MS and ADM/Fe3O4-MS. The results showed that the prepared MS, ADM-MS and ADM/Fe3O4-MS in this study had relatively uniform particle sizes, and the particle sizes of most microspheres were between 200 to 300 μm, which were 223.3±91.1 μm, 210.8±71.8 μm and 217.7±57.4 μm, respectively.
